# Supplementary material
Source: PubMed Central journal article supplement (PMC1363692)

**MCMC runs – linear model (S1)**

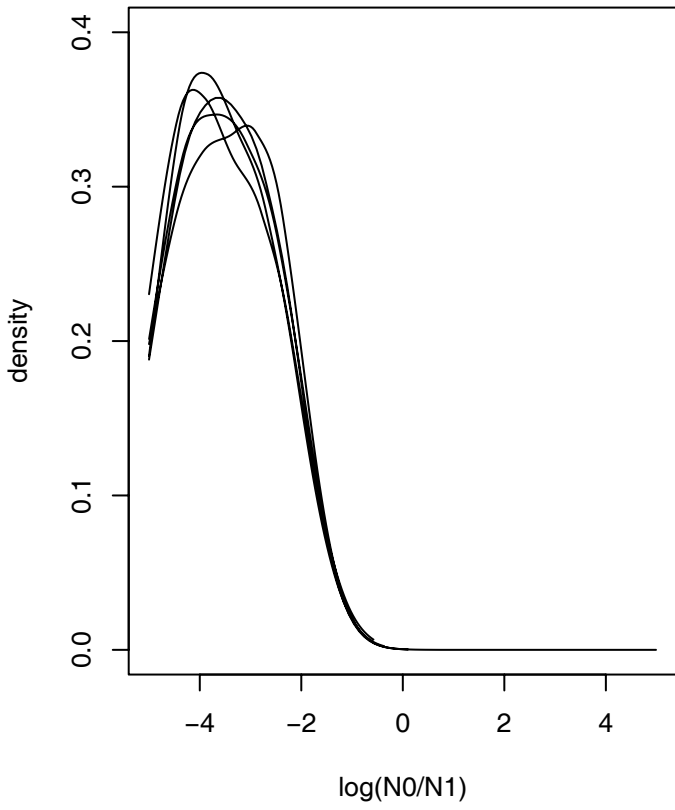

**MCMC runs – exponential model (S1)**

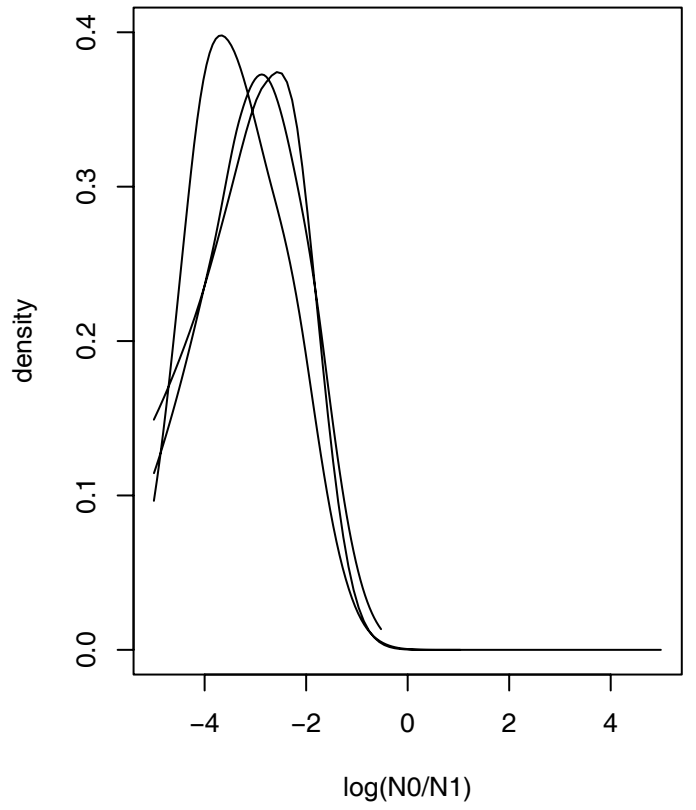

**MCMC runs – linear model (S2)**

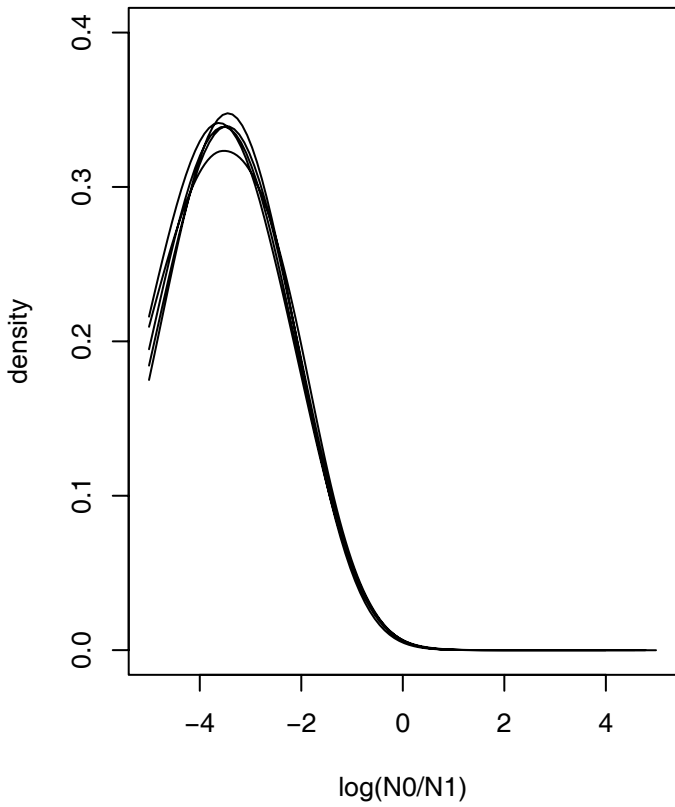

**MCMC runs – exponential model (S1)**

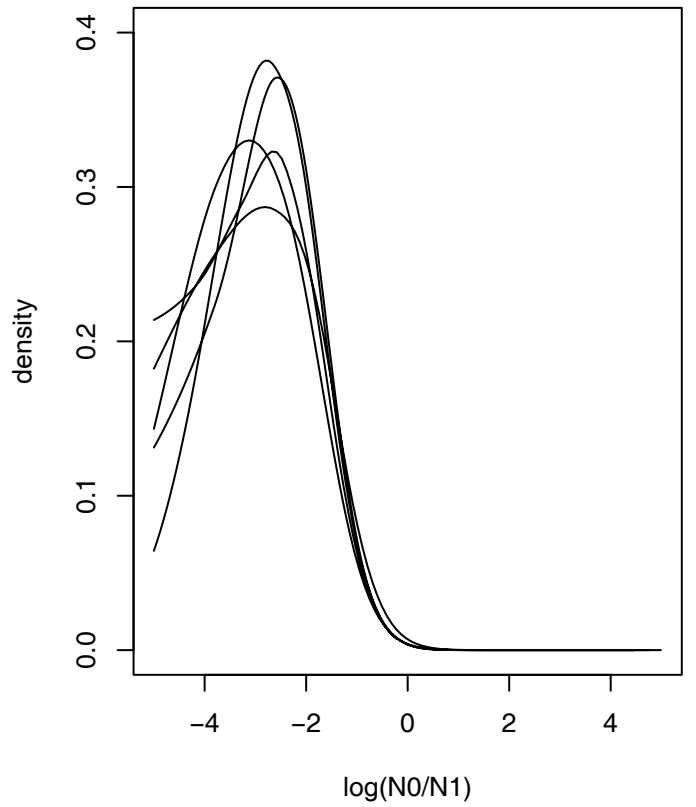

Supplement: pbio.0040025.sg001.pdf [file pbio.0040025.sg001.pdf]
