# Supplementary material
Source: PubMed Central journal article supplement (PMC1363692)

### Independent MCMC runs for S1

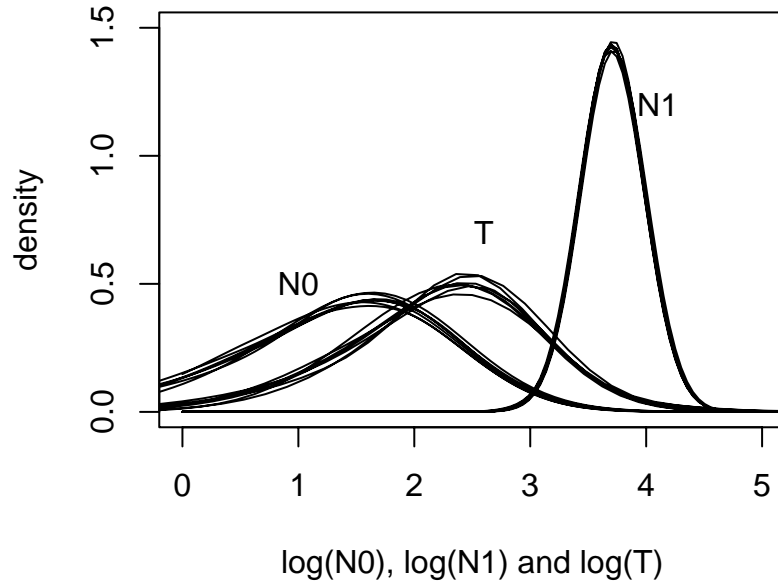

### Independent MCMC runs for S2

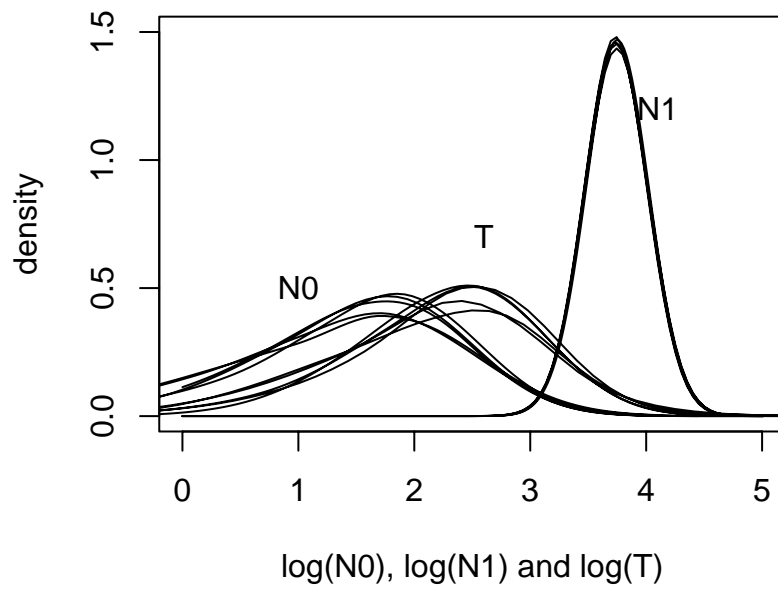

Supplement: pbio.0040025.sg002.pdf [file pbio.0040025.sg002.pdf]
